# Supplementary material for: Monoamine oxidase A and organic cation transporter 3 coordinate intracellular β1AR signaling to calibrate cardiac contractile function
Source: PubMed Central journal article supplement (PMC9288959; doi:10.1007/s00395-022-00944-5), 2022-07-17

# Online Figure I

**A**

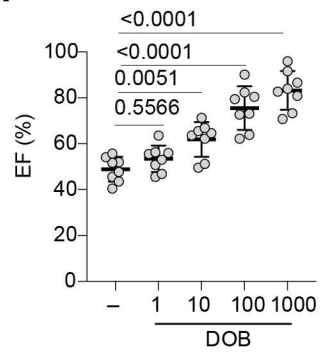

**B**

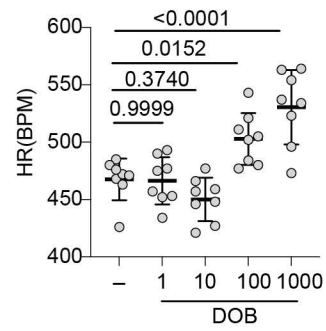

**C**

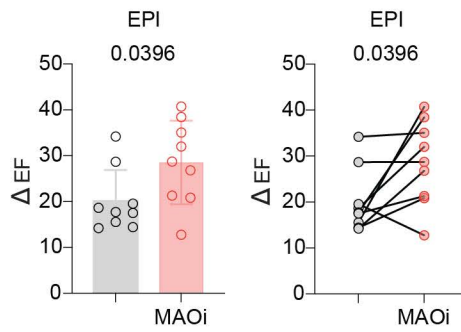

**D**

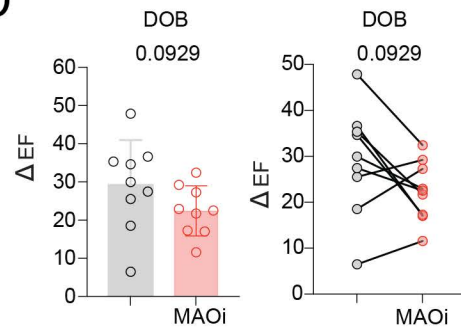

# Online Figure II

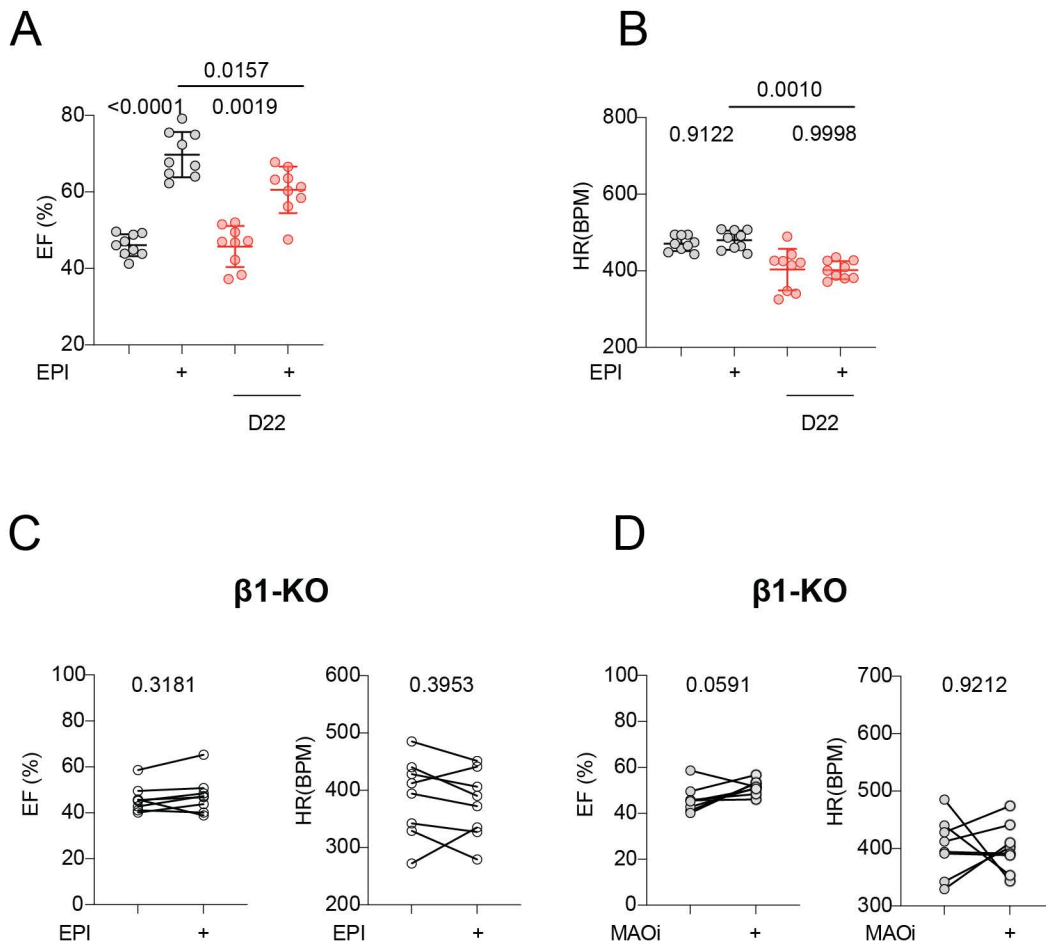

# Online Figure III

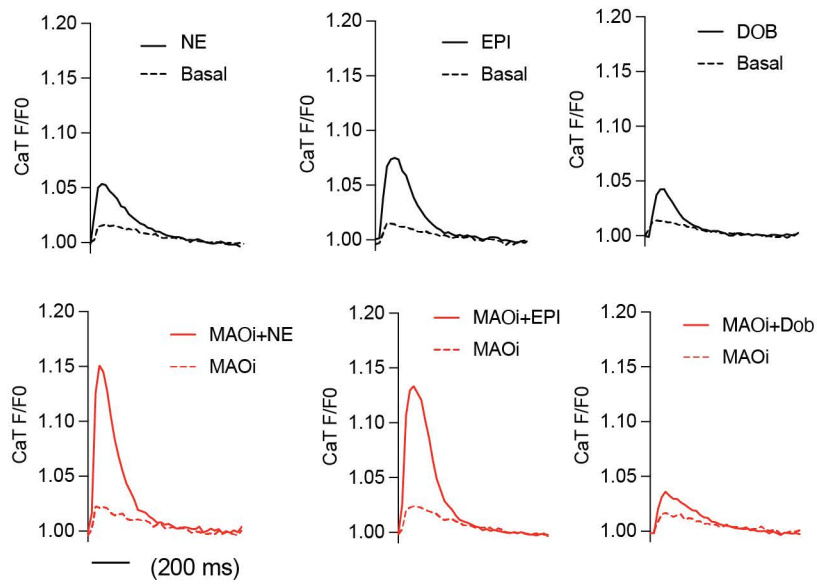

# Online Figure IV

**A**

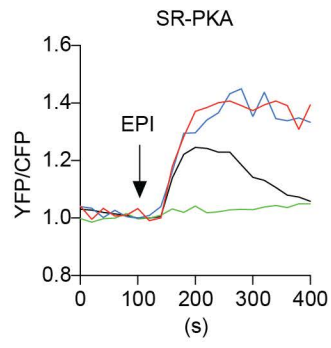

**B**

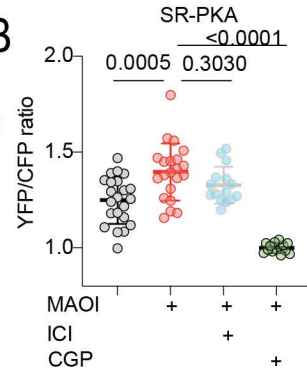

# Online Figure V

**A**

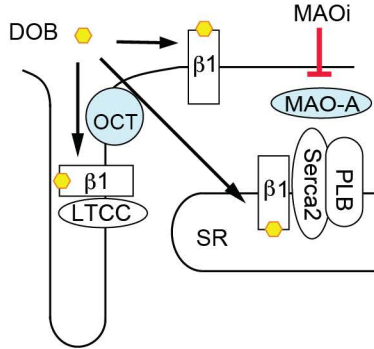

**B**

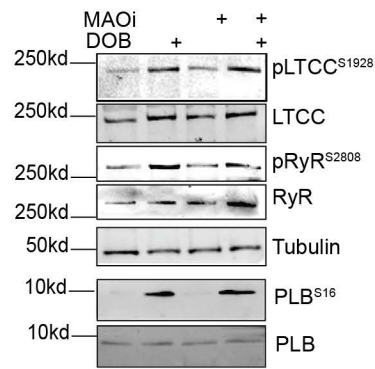

**C**

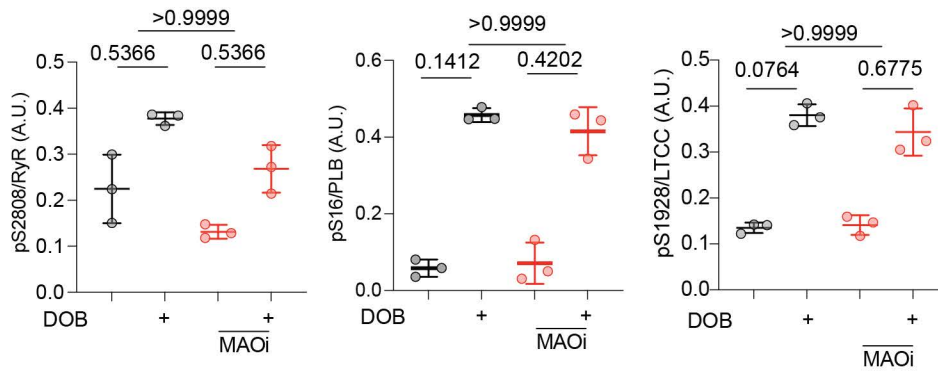

**D**

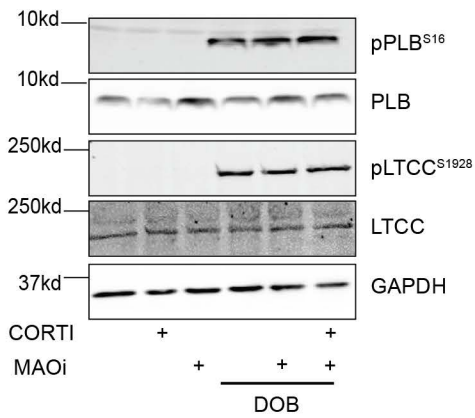

**E**

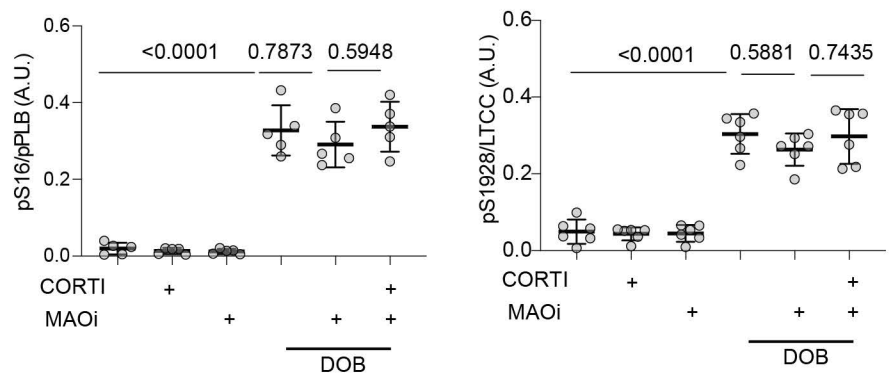

# Online Figure VI

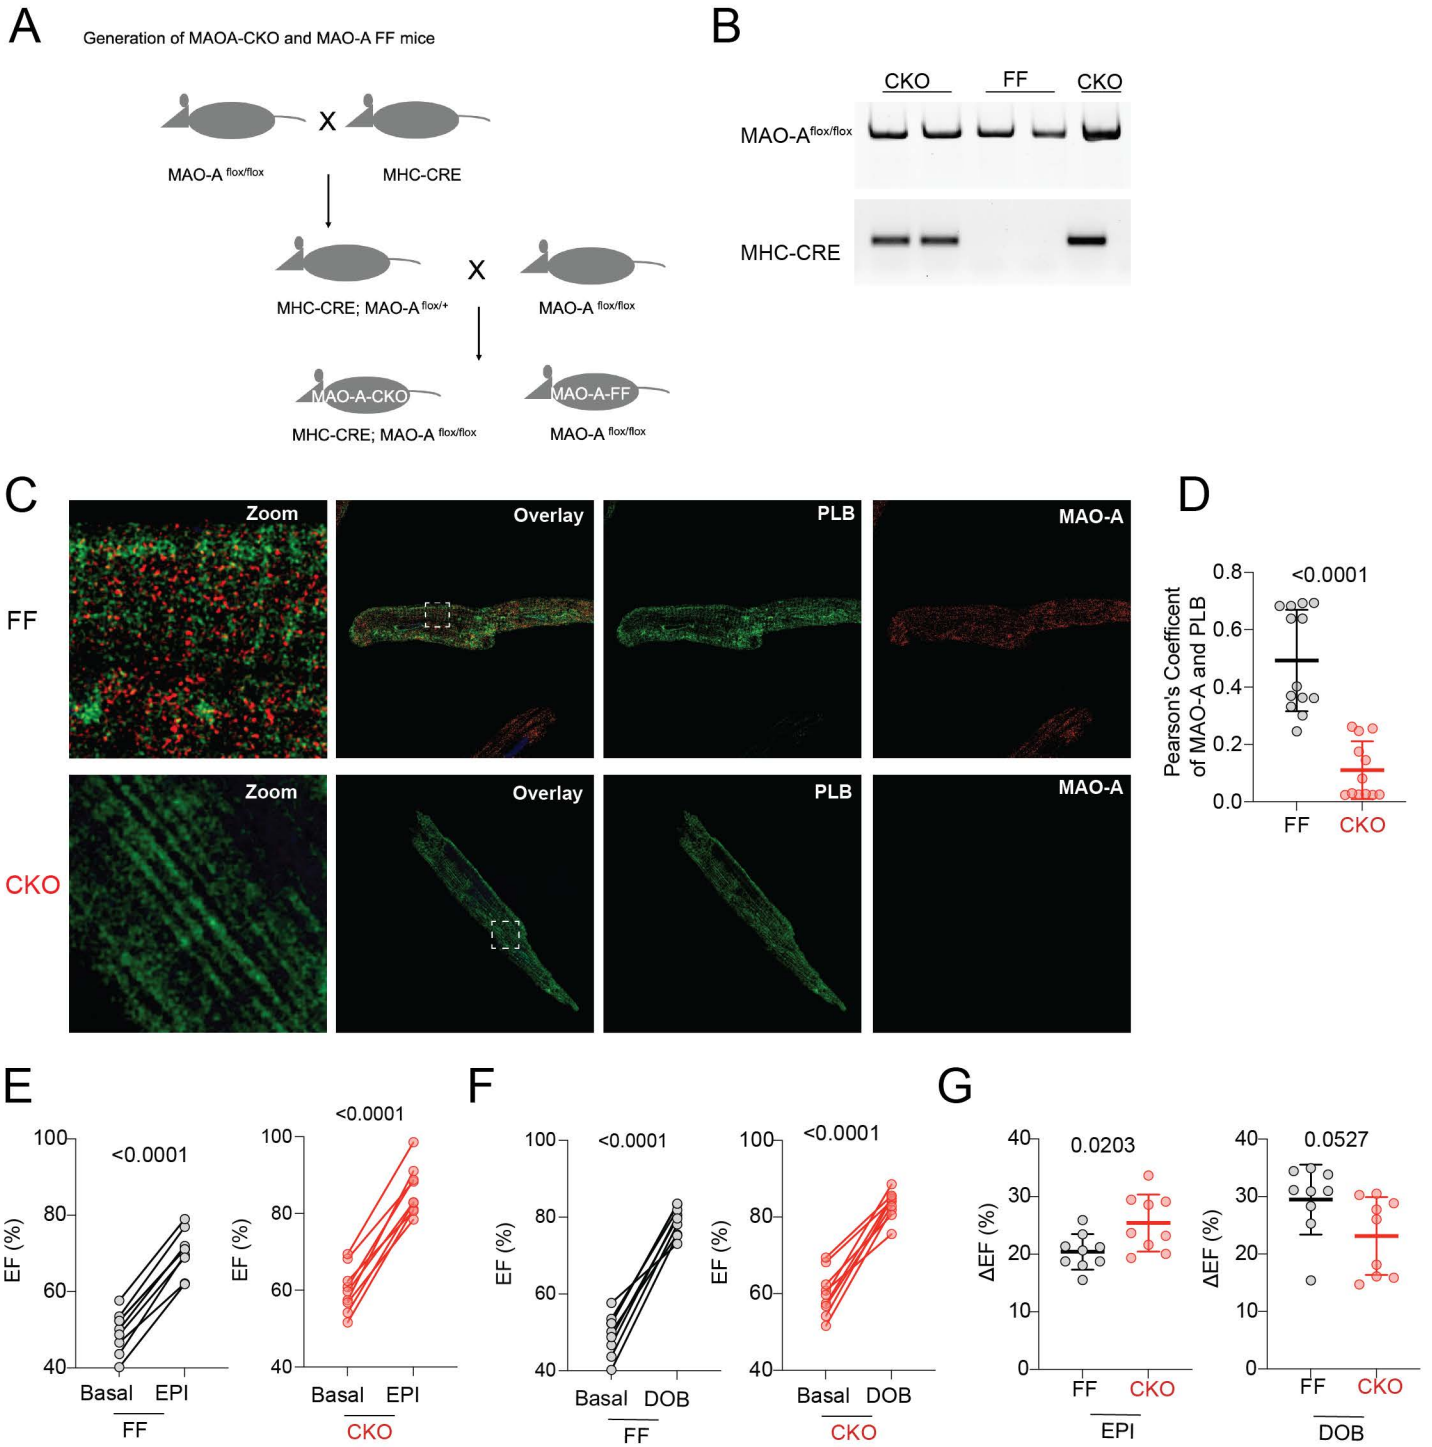

# Online Figure VII

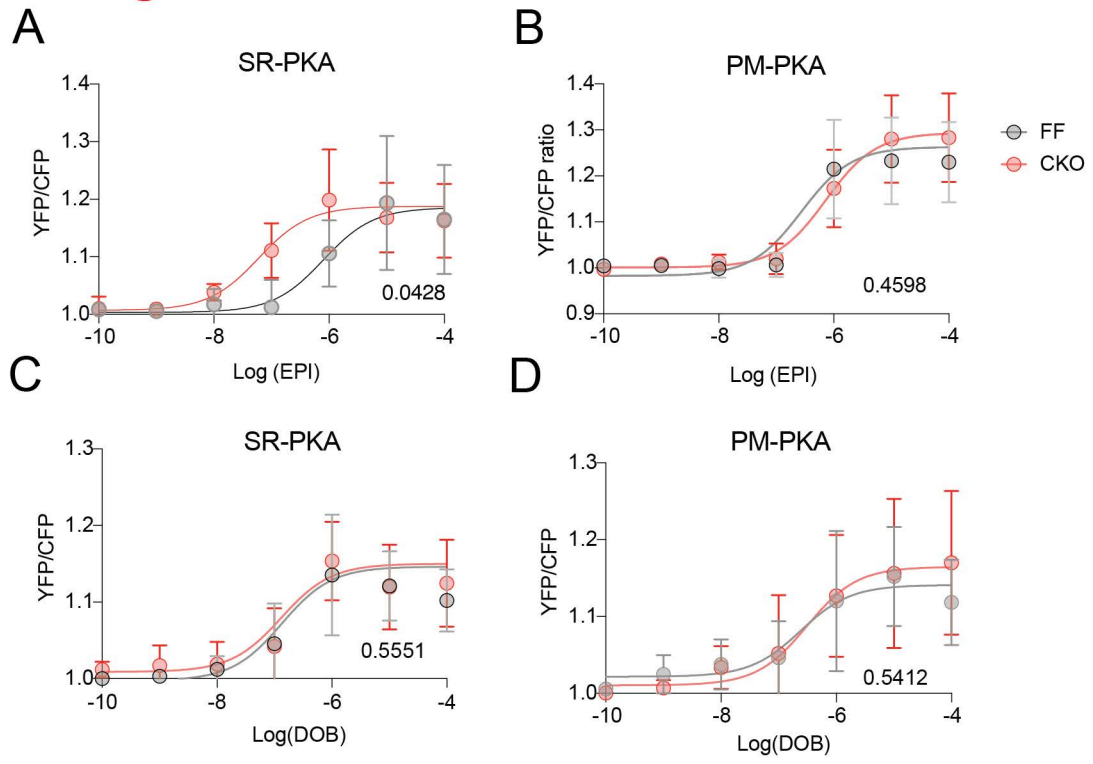

# Online Figure VIII

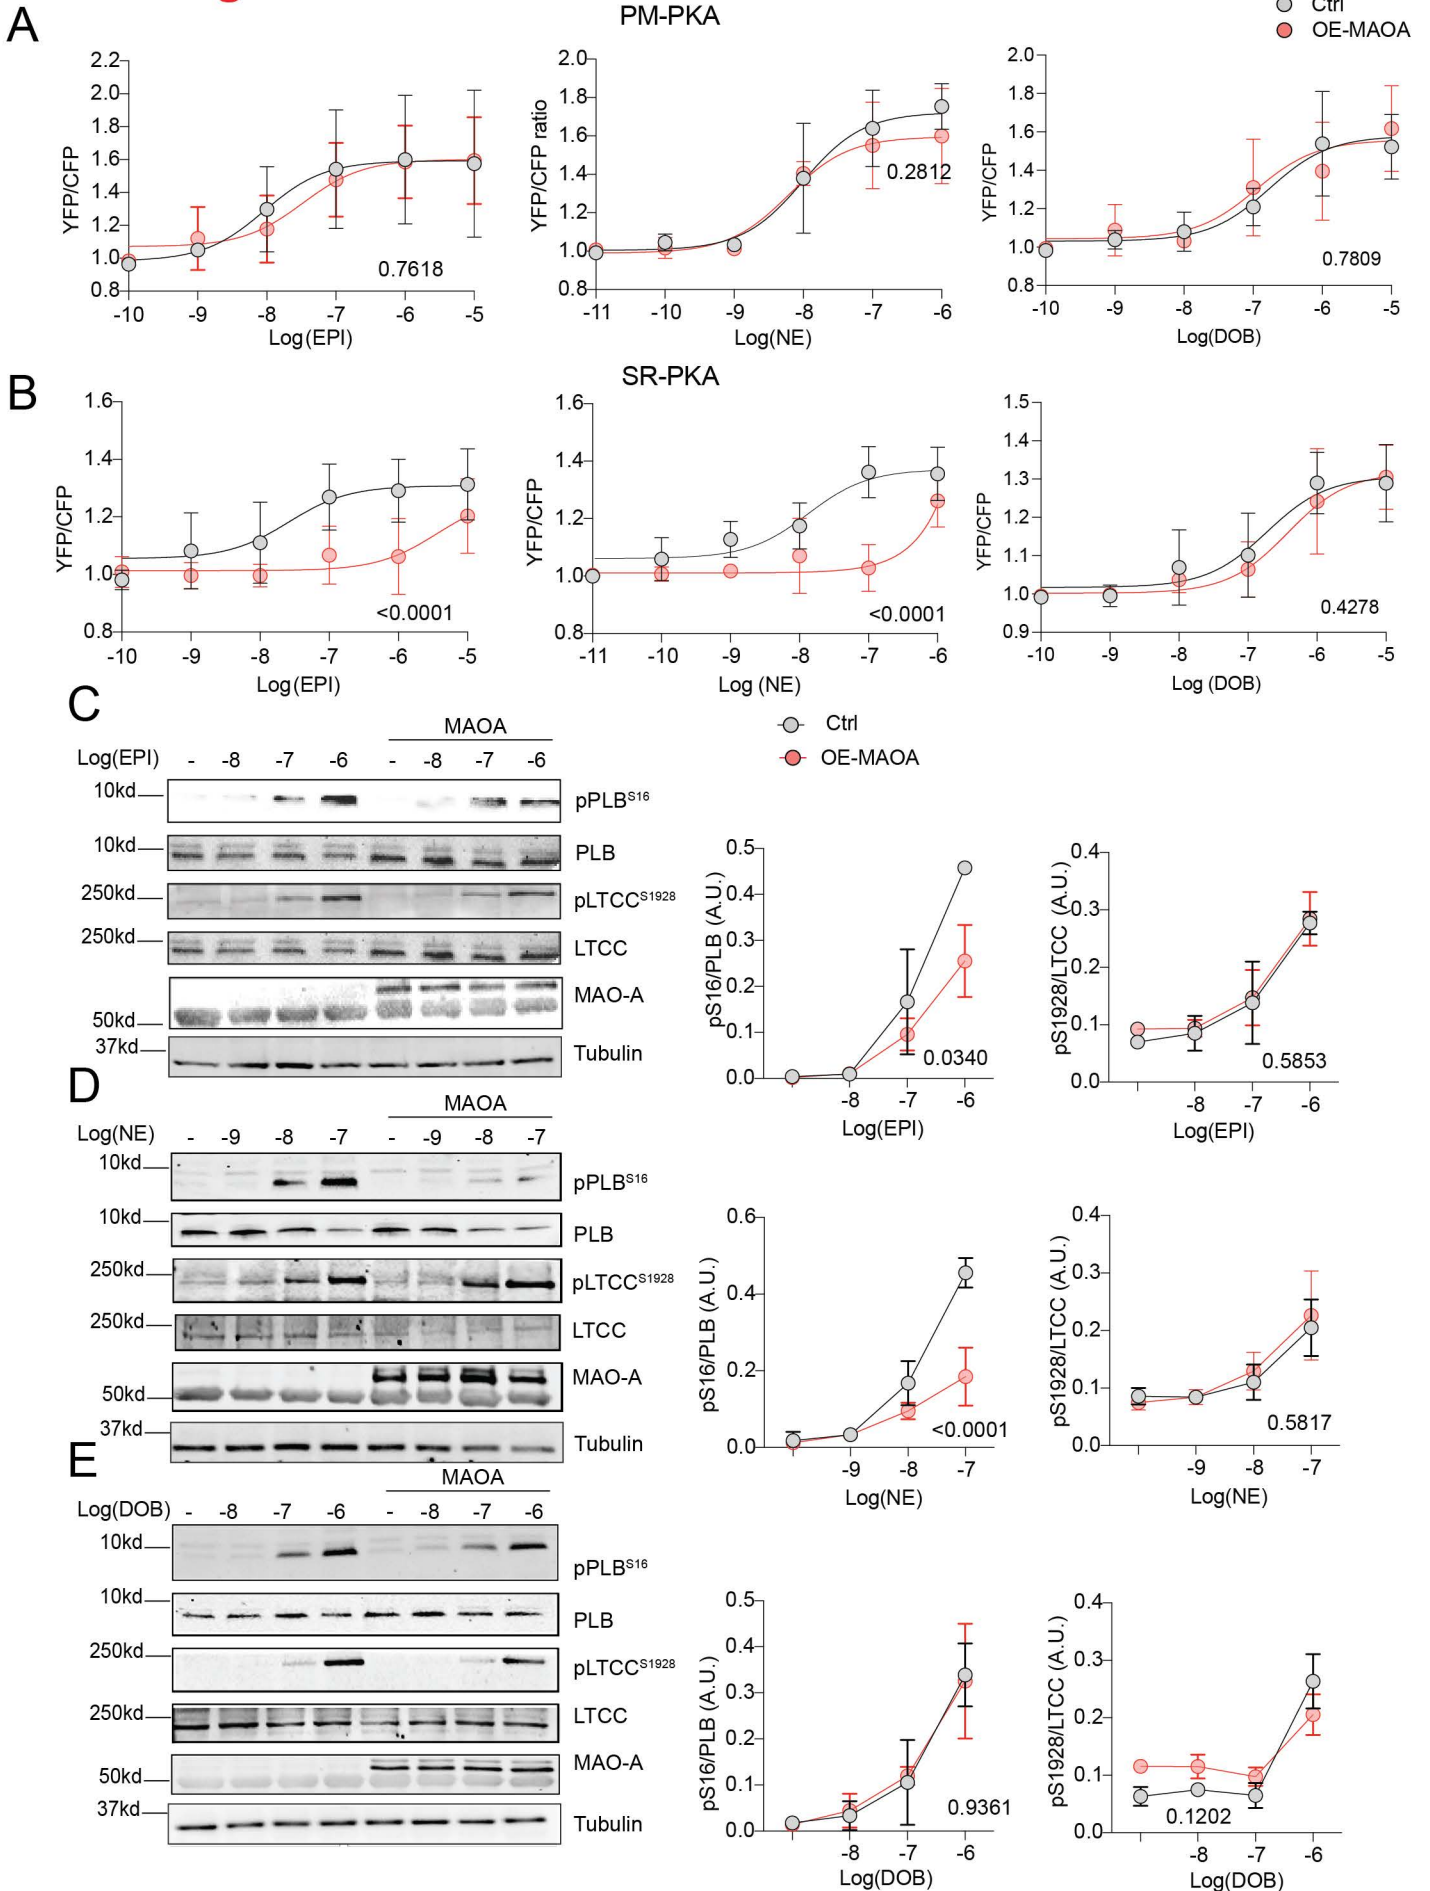



# Online Figure IX

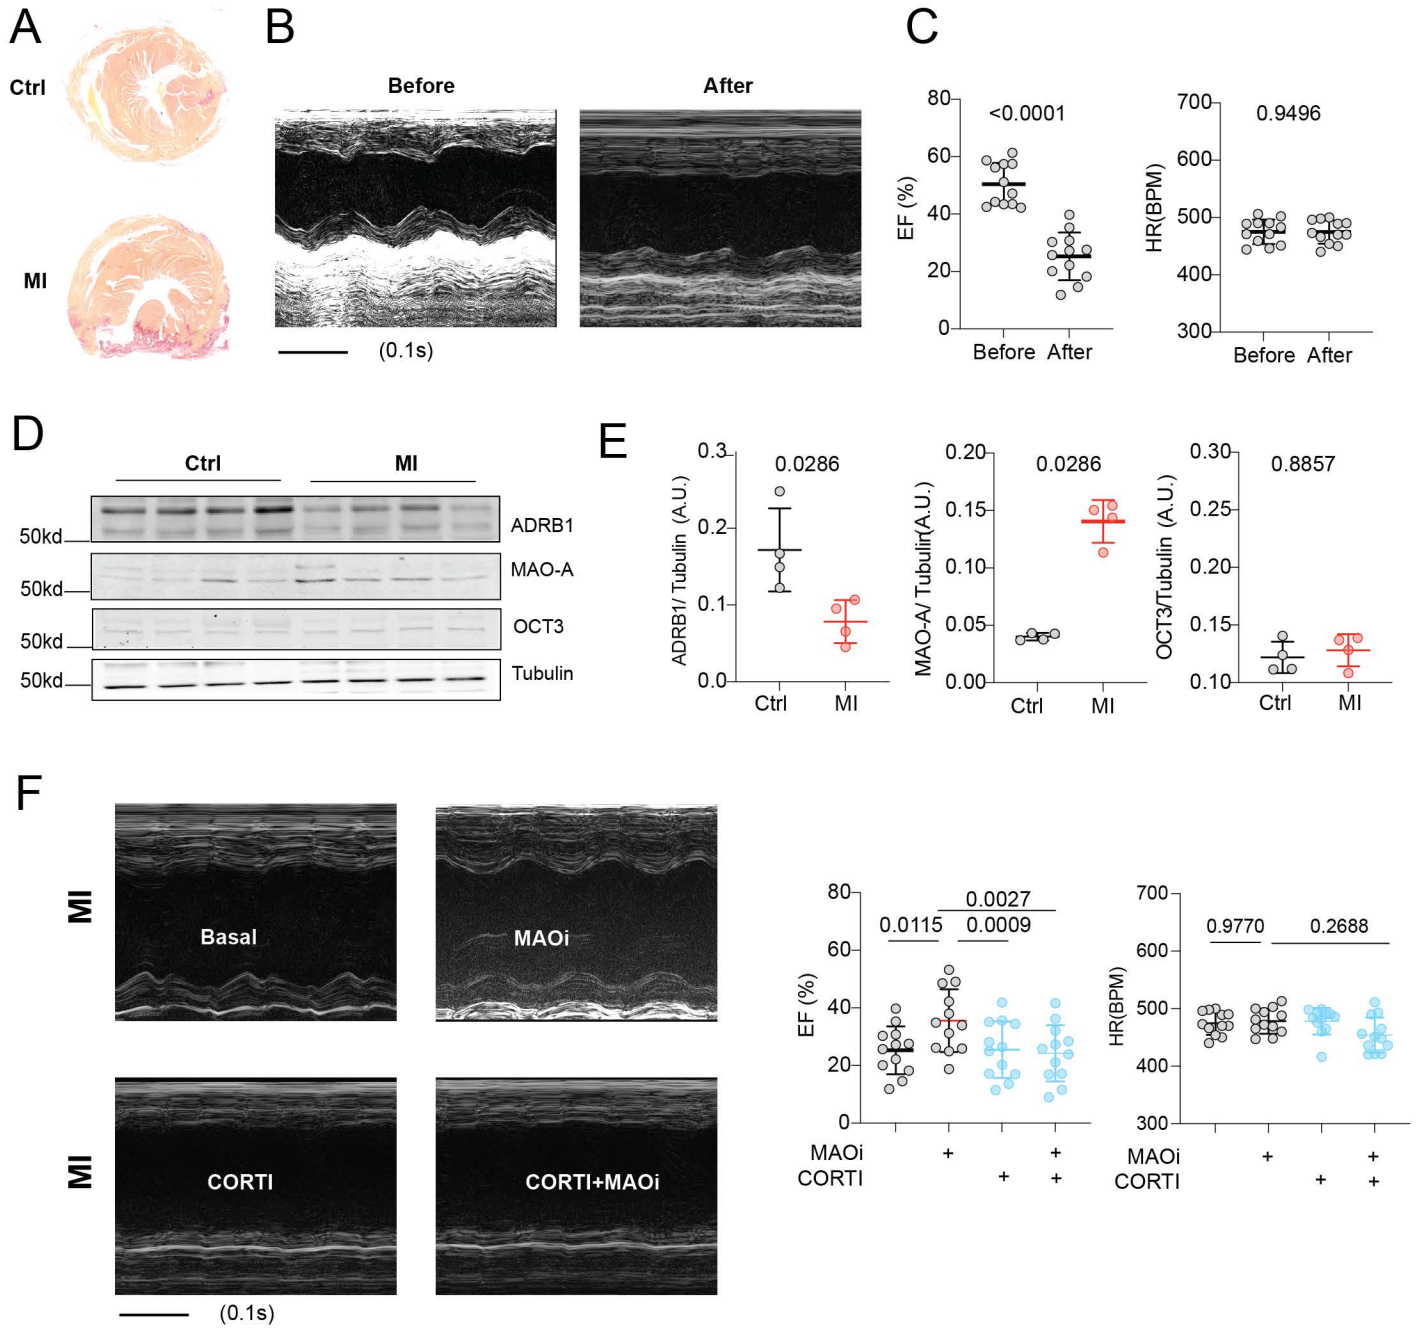

Supplement: 395_2022_944_MOESM1_ESM.pdf [file 395_2022_944_MOESM1_ESM.pdf]
